# Supplementary material for: Severe COVID-19 in Hospitalized Carriers of Single CFTR Pathogenic Variants
Source: MDPI journal article supplement (doi:10.3390/jpm11060558), 2021-06-15
Supplement: s1 [file s1]

**Table S5.** Univariable Cox analysis and risk factors related to fatal outcome

| Variable                          | Level          | HR   | 95% CI     | Wald test p |
|-----------------------------------|----------------|------|------------|-------------|
| <b>14-day fatal outcome</b>       |                |      |            |             |
| Sex                               | female vs male | 1.46 | 0.74-2.9   | 0.2742      |
| Age                               | ≥75 years      | 4.53 | 2.27-9.04  | <0.0001     |
| Age                               | ≥65 years      | 5.78 | 2.23-14.98 | 0.0003      |
| Blood type A                      | yes vs no      | 1.21 | 0.55-2.65  | 0.6374      |
| <b>Genetic profile</b>            |                |      |            |             |
| Carrier of one CF-causing variant | yes vs no      | 2.86 | 1.01-8.15  | 0.0480      |
| <b>Comorbidities</b>              |                |      |            |             |
| Diabetes                          | yes vs no      | 0.85 | 0.30-2.42  | 0.7614      |
| Malignancy                        | yes vs no      | 0.64 | 0.15-2.67  | 0.5408      |
| CHF and CAD                       | yes vs no      | 1.31 | 0.46-3.72  | 0.6163      |
| Hypertension                      | yes vs no      | 0.60 | 0.27-1.34  | 0.2135      |
| Asthma and COPD                   | yes vs no      | 1.14 | 0.40-3.25  | 0.8012      |
| <b>Serum Biochemistry</b>         |                |      |            |             |
| C-reactive protein (mg/dl)        | ≥20            | 1.50 | 0.70-3.21  | 0.2951      |
| Aspartate Aminotransferase (U/L)  | ≥40            | 1.52 | 0.65-3.55  | 0.3367      |
| Alanine Aminotransferase (U/L)    | ≥40            | 0.43 | 0.19-0.97  | 0.0414      |
| Lactic Acid Dehydrogenase (U/L)   | ≥400           | 3.64 | 1.3-10.22  | 0.0141      |
| <b>28-day fatal outcome</b>       |                |      |            |             |
| Sex                               | female vs male | 1.18 | 0.65-2.14  | 0.5864      |
| Age                               | ≥75 years      | 4.00 | 2.21-7.24  | <0.0001     |
| Age                               | ≥65 years      | 5.47 | 2.44-12.27 | <0.0001     |
| Blood type A                      | yes vs no      | 0.97 | 0.49-1.90  | 0.9233      |
| <b>Genetic profile</b>            |                |      |            |             |
| Carrier of one CF-causing variant | yes vs no      | 1.97 | 0.7-5.5    | 0.1978      |
| <b>Comorbidities</b>              |                |      |            |             |
| Diabetes                          | yes vs no      | 0.79 | 0.31-1.99  | 0.6124      |
| Malignancy                        | yes vs no      | 0.71 | 0.22-2.29  | 0.5679      |
| CHF and CAD                       | yes vs no      | 1.25 | 0.49-3.17  | 0.6374      |
| Hypertension                      | yes vs no      | 0.61 | 0.31-1.21  | 0.1577      |
| Asthma and COPD                   | yes vs no      | 0.88 | 0.31-2.45  | 0.8012      |
| <b>Serum Biochemistry</b>         |                |      |            |             |
| C-reactive protein (mg/dl)        | ≥20            | 1.35 | 0.71-2.60  | 0.3608      |
| Aspartate Aminotransferase (U/L)  | ≥40            | 1.96 | 0.91-4.23  | 0.0846      |
| Alanine Aminotransferase (U/L)    | ≥40            | 0.59 | 0.30-1.16  | 0.1273      |
| Lactic Acid Dehydrogenase (U/L)   | ≥400           | 3.57 | 1.50-8.51  | 0.0040      |

| 60-day fatal outcome              |                |      |           |             |
|-----------------------------------|----------------|------|-----------|-------------|
| Variable                          | Level          | HR   | 95% CI    | Wald test p |
| Sex                               | female vs male | 1.12 | 0.64-1.96 | 0.6984      |
| Age                               | ≥75 years      | 3.33 | 1.91-5.8  | <0.0001     |
| Age                               | ≥65 years      | 4.71 | 2.29-9.68 | <0.0001     |
| Blood type A                      | yes vs no      | 1.06 | 0.57-1.97 | 0.8510      |
| <b>Genetic profile</b>            |                |      |           |             |
| Carrier of one CF-causing variant | yes vs no      | 1.70 | 0.61-4.73 | 0.3087      |
| <b>Comorbidities</b>              |                |      |           |             |
| Diabetes                          | yes vs no      | 0.97 | 0.44-2.17 | 0.9476      |
| Malignancy                        | yes vs no      | 0.64 | 0.20-2.04 | 0.4466      |
| CHF and CAD                       | yes vs no      | 1.58 | 0.71-3.5  | 0.2644      |
| Hypertension                      | yes vs no      | 0.55 | 0.29-1.06 | 0.0741      |
| Asthma and COPD                   | yes vs no      | 0.95 | 0.38-2.41 | 0.9212      |
| <b>Serum Biochemistry</b>         |                |      |           |             |
| C-reactive protein (mg/dl)        | ≥20            | 1.33 | 0.72-2.45 | 0.3660      |
| Aspartate Aminotransferase (U/L)  | ≥40            | 2.25 | 1.06-4.76 | 0.0342      |
| Alanine Aminotransferase (U/L)    | ≥40            | 0.71 | 0.37-1.37 | 0.3066      |
| Lactic Acid Dehydrogenase (U/L)   | ≥400           | 3.56 | 1.59-7.98 | 0.0020      |
