# Supplementary material for: Severe COVID-19 in Hospitalized Carriers of Single CFTR Pathogenic Variants
Source: MDPI journal article supplement (doi:10.3390/jpm11060558), 2021-06-15
Supplement: s1 [file s1]

**Table S1.** Prevalence of comorbidities by COVID-19 outcome scale and sex

| Chronic Conditions, No. (%)                                          | Whole Cohort<br>(n=874) | Female (n=377) | Male (n=496) |
|----------------------------------------------------------------------|-------------------------|----------------|--------------|
| <b>Hypertension</b>                                                  |                         |                |              |
| Cat. 1 (Death; n=55)                                                 | 14 (25.45) **           | 7 (50)         | 7 (50)       |
| Cat. 2 (Invasive mechanical ventilation; n=70)                       | 31 (44.29) **           | 9 (29.03)      | 22 (70.97)   |
| Cat. 3 (CPAP/BiPAP; n=146)                                           | 52 (35.62) **           | 13 (25)        | 39 (75)      |
| Cat. 4 (Hospitalized, receiving supplemental low flow oxygen; n=276) | 112 (40.58) **          | 49 (43.75)     | 63 (56.25)   |
| Cat. 5 (Hospitalized, not receiving supplemental oxygen; n=122)      | 23 (18.85) *            | 10 (43.48)     | 13 (56.52)   |
| Cat. 6 (Not hospitalized; n=205)                                     | 11 (5.36)               | 5 (45.45)      | 6 (54.55)    |
| <b>Diabetes</b>                                                      |                         |                |              |
| Cat. 1 (Death; n=55)                                                 | 8 (14.55) **            | 2 (25)         | 6 (75)       |
| Cat. 2 (Invasive mechanical ventilation; n=70)                       | 11 (15.71) **           | 4 (36.36)      | 7 (63.64)    |
| Cat. 3 (CPAP/BiPAP; n=146)                                           | 24 (16.44) **           | 8 (33.33)      | 16 (66.67)   |
| Cat. 4 (Hospitalized, receiving supplemental low flow oxygen; n=276) | 47 (17.03) **           | 20 (42.55)     | 27 (57.45)   |
| Cat. 5 (Hospitalized, not receiving supplemental oxygen; n=122)      | 10 (8.2) *              | 6 (60)         | 4 (40)       |
| Cat. 6 (Not hospitalized; n=205)                                     | 5 (2.44)                | 4 (20)         | 1 (20)       |
| <b>Asthma and COPD</b>                                               |                         |                |              |
| Cat. 1 (Death; n=55)                                                 | 5 (9.09) §              | 3 (33.33)      | 2 (66.67)    |
| Cat. 2 (Invasive mechanical ventilation; n=70)                       | 13 (18.57) **           | 3 (23.08)      | 10 (76.92)   |
| Cat. 3 (CPAP/BiPAP; n=146)                                           | 17 (11.64) **           | 7 (41.18)      | 10 (58.82)   |
| Cat. 4 (Hospitalized, receiving supplemental low flow oxygen; n=276) | 30 (10.87) **           | 16 (53.33)     | 14 (46.67)   |
| Cat. 5 (Hospitalized, not receiving supplemental oxygen; n=122)      | 6 (4.92) §              | 4 (66.67)      | 2 (33.33)    |
| Cat. 6 (Not hospitalized; n=205)                                     | 1 (0.49)                | 0              | 1 (100)      |
| <b>CHF and CAD</b>                                                   |                         |                |              |
| Cat. 1 (Death; n=55)                                                 | 8 (14.55) **            | 3 (37.50)      | 5 (62.5)     |
| Cat. 2 (Invasive mechanical ventilation; n=70)                       | 4 (5.71) §              | 1 (25)         | 3 (75)       |
| Cat. 3 (CPAP/BiPAP; n=146)                                           | 12 (8.22) *             | 4 (33.33)      | 8 (66.67)    |
| Cat. 4 (Hospitalized, receiving supplemental low flow oxygen; n=276) | 33 (11.96) **           | 9 (27.27)      | 24 (72.73)   |
| Cat. 5 (Hospitalized, not receiving supplemental oxygen; n=122)      | 9 (7.38) **             | 3 (33.33)      | 6 (66.67)    |
| Cat. 6 (Not hospitalized; n=205)                                     | 2 (0.98)                | 1 (50)         | 1 (50)       |

| Chronic Conditions, No. (%)                                          | Whole Cohort<br>(n=874) | Female (n=377) | Male (n=496) |
|----------------------------------------------------------------------|-------------------------|----------------|--------------|
| <b>Malignancy</b>                                                    |                         |                |              |
| Cat. 1 (Death; n=55)                                                 | 4 (7.27) *              | 2 (50)         | 2 (50)       |
| Cat. 2 (Invasive mechanical ventilation; n=70)                       | 5 (7.14)                | 1 (20)         | 4 (80)       |
| Cat. 3 (CPAP/BiPAP; n=146)                                           | 15 (10.27) *            | 9 (60) °°      | 6 (40)       |
| Cat. 4 (Hospitalized, receiving supplemental low flow oxygen; n=276) | 22 (7.97) §             | 12 (54.55)     | 10 (45.45)   |
| Cat. 5 (Hospitalized, not receiving supplemental oxygen; n=122)      | 13 (10.66) §            | 8 (61.54)      | 5 (38.46)    |
| Cat. 6 (Not hospitalized; n=205)                                     | 6 (2.93)                | 3 (50)         | 3 (50)       |
| <b>Hypothyroidism</b>                                                |                         |                |              |
| Cat. 1 (Death; n=55)                                                 | 3 (5.45)                | 3 (100)        | 0            |
| Cat. 2 (Invasive mechanical ventilation; n=70)                       | 5 (7.14)                | 3 (60)         | 2 (40)       |
| Cat. 3 (CPAP/BiPAP; n=146)                                           | 7 (4.79)                | 3 (42.86)      | 4 (57.14)    |
| Cat. 4 (Hospitalized, receiving supplemental low flow oxygen; n=276) | 13 (4.71)               | 9 (69.23) °    | 4 (30.77)    |
| Cat. 5 (Hospitalized, not receiving supplemental oxygen; n=122)      | 8 (6.56)                | 6 (75)         | 2 (25)       |
| Cat. 6 (Not hospitalized; n=205)                                     | 6 (2.93)                | 5 (83.33)      | 1 (16.67)    |
| <b>Obesity</b>                                                       |                         |                |              |
| Cat. 1 (Death; n=55)                                                 | 2 (3.64)                | 1 (50)         | 1 (50)       |
| Cat. 2 (Invasive mechanical ventilation; n=70)                       | 10 (14.29) **           | 3 (30)         | 7 (70)       |
| Cat. 3 (CPAP/BiPAP; n=146)                                           | 5 (3.42)                | 1 (20)         | 4 (80)       |
| Cat. 4 (Hospitalized, receiving supplemental low flow oxygen; n=276) | 8 (2.9)                 | 6 (75)         | 2 (25)       |
| Cat. 5 (Hospitalized, not receiving supplemental oxygen; n=122)      | 3 (2.46)                | 1 (33.33)      | 2 (66.67)    |
| Cat. 6 (Not hospitalized; n=205)                                     | 1 (0.49)                | 1 (100)        | 0            |

CPAP: Continuous Positive Airway Pressure; BiPAP: Bilevel Positive Airway Pressure; CHF: Congestive Heart Failure; CAD: Coronary Artery Disease; COPD: Chronic Obstructive Pulmonary Disease. Percentage in column 2 indicates the prevalence in the whole cohort while in column 3 and 4 it refers to the prevalence of males and females in the group indicated in the corresponding line (i.e. COVID-19 category of chronic condition). Fisher exact test was performed. \*\*p<0.001; \*p<0.01; §p<0.05 vs Cat. 6 - °p<0.05; °°p<0.01 vs other sex.
