# Supplementary material for: Severe COVID-19 in Hospitalized Carriers of Single CFTR Pathogenic Variants
Source: MDPI journal article supplement (doi:10.3390/jpm11060558), 2021-06-15
Supplement: s1 [file s1]

**Table S2.** CF causing variants in COVID-19 patients

| Patient                                 | Gender | Age (years) | COVID-19 Outcome scale Category | Chronic Conditions                                                  | CF-causing <i>CFTR</i> variants | Other <i>CFTR</i> rare variants | Val470Met common variant |
|-----------------------------------------|--------|-------------|---------------------------------|---------------------------------------------------------------------|---------------------------------|---------------------------------|--------------------------|
| <b>Carriers of 1 CF-causing variant</b> |        |             |                                 |                                                                     |                                 |                                 |                          |
| 1 <sup>^</sup>                          | M      | 72          | 1                               | --                                                                  | Gly1069Arg                      | Asn417Lys                       | homo                     |
| 2                                       | F      | 64          | 1                               | Obesity                                                             | Asn1303Lys                      | --                              | homo                     |
| 3                                       | F      | 84          | 1                               | Hypotiroidism, CHD, Neurological disease                            | Phe1052Val                      | --                              | hetero                   |
| 4                                       | M      | 86          | 1                               | AF, Parkinson Disease                                               | Phe508del                       | --                              | hetero                   |
| 5                                       | M      | 32          | 2                               | --                                                                  | Phe508del                       | Arg347Cys                       | homo                     |
| 6                                       | M      | 37          | 2                               | --                                                                  | Leu967Ser                       |                                 | hetero                   |
| 7                                       | M      | 69          | 2                               | --                                                                  | Phe508del                       |                                 | homo                     |
| 8                                       | M      | 30          | 2                               | --                                                                  | Phe508del                       | Ala238Val                       | homo                     |
| 9                                       | F      | 75          | 2                               | Hypertension                                                        | Phe1052Val                      | --                              | hetero                   |
| 10                                      | M      | 63          | 2                               | HIV                                                                 | c.1585-1G>A                     | --                              | hetero                   |
| 11                                      | M      | 36          | 3                               | Asthma                                                              | Phe508del                       | --                              | hetero                   |
| 12                                      | M      | 89          | 3                               | Asthma, CKD                                                         | Phe508del                       | --                              | hetero                   |
| 13                                      | F      | 78          | 3                               | CHF, Malignancy, DM, COPD                                           | Ser1455*                        | --                              | --                       |
| 14                                      | M      | 53          | 3                               | CHD                                                                 | Gly1069Arg                      | --                              | --                       |
| 15                                      | F      | 77          | 3                               | --                                                                  | Gly542*                         | Val562Ile                       | homo                     |
| 16                                      | F      | 76          | 3                               | CHD, Dyslipidemia                                                   | Phe508del                       | --                              | homo                     |
| 17                                      | F      | 51          | 3                               | Malignancy                                                          | Phe508del                       | --                              | hetero                   |
| 18                                      | M      | 46          | 3                               | --                                                                  | Trp1282*                        | --                              | hetero                   |
| 19                                      | M      | 52          | 4                               | --                                                                  | Ser945Leu                       | --                              | hetero                   |
| 20                                      | F      | 31          | 4                               | --                                                                  | Leu967Ser                       | --                              | --                       |
| 21                                      | M      | 66          | 4                               | Hypertension, Dyslipidemia                                          | Arg347Pro                       | --                              | --                       |
| 22                                      | M      | 63          | 4                               | Hypertension, Dyslipidemia                                          | c.1585-1G>A                     | --                              | hetero                   |
| 23                                      | M      | 47          | 4                               | --                                                                  | Arg1066His                      | --                              | homo                     |
| 24                                      | F      | 54          | 4                               | --                                                                  | Gln39*                          | --                              | hetero                   |
| 25                                      | M      | 88          | 4                               | CHF, AF, aortic valve replacement, hypertension, CKD, hyperuricemia | Thr338Ile                       | --                              | hetero                   |
| 26                                      | M      | 67          | 5                               |                                                                     | Arg347Pro                       | --                              | --                       |
| 27                                      | M      | 60          | 5                               | CHF                                                                 | Gly1069Arg                      | --                              | --                       |
| 28                                      | F      | 59          | 5                               | Leukoencephalopathy                                                 | Gly1349Asp                      | --                              | hetero                   |
| 29 <sup>^</sup>                         | F      | 46          | 5                               | --                                                                  | Leu967Ser                       | --                              | --                       |

| Patient                                 | Gender | Age<br>(years) | COVID-19<br>Outcome<br>scale<br>Category | Chronic<br>Conditions | CF-causing<br>CFTR variants | Other<br>CFTR rare<br>variants | Val470Met<br>common<br>variant |
|-----------------------------------------|--------|----------------|------------------------------------------|-----------------------|-----------------------------|--------------------------------|--------------------------------|
| 30                                      | M      | 45             | 5                                        | --                    | Phe508del                   | --                             | hetero                         |
| 31                                      | M      | 47             | 6                                        | -                     | Leu967Ser                   | --                             | --                             |
| 32                                      | F      | 60             | 6                                        | Asthma                | Phe508del                   | --                             | hetero                         |
| 33                                      | M      | 28             | 6                                        |                       | Phe508del                   | Gly576Ala;<br>Arg668Cys        | homo                           |
| 34                                      | F      | 51             | 6                                        | --                    | Arg1162*                    | --                             | hetero                         |
| 35                                      | M      | 31             | 6                                        | Brugada<br>syndrome   | Phe508del                   | --                             | homo                           |
| 36                                      | M      | 43             | 6                                        | --                    | Phe508del                   | --                             | hetero                         |
| 37                                      | M      | 60             | 6                                        | --                    | Gly1069Arg                  | --                             | --                             |
| 38                                      | M      | 21             | 6                                        | DM, mild<br>ID        | Gly542*                     | Asn417Lys                      | homo                           |
| 39                                      | M      | 49             | 6                                        | --                    | Gly1069Arg                  | --                             | --                             |
| 40                                      | F      | 48             | 6                                        | --                    | Asn1303Thrfs*25             | --                             | hetero                         |
| <b>Carrier of 2 CF-causing variants</b> |        |                |                                          |                       |                             |                                |                                |
| 1                                       | M      | 52             | 4                                        | CHD                   | Phe508del;<br>Phe1052Val    | --                             | homo                           |

COVID-19 Outcome Scale categories: 1, death; 2, hospitalized receiving invasive mechanical ventilation; 3, hospitalized, receiving Continuous positive airway pressure (CPAP) or Bilevel Positive Airway Pressure (BiPAP) ventilation; 4, hospitalized, receiving supplemental oxygen without positive pressure or high flow; 5, hospitalized, not receiving supplemental oxygen; 6, not hospitalized. CHD: Coronary heart disease; AF: Atrial Fibrillation; CKD: Chronic Kidney Disease; CHF: Congestive Heart Failure; DM: Diabetes Mellitus; COPD: Chronic Obstructive Pulmonary Disease; ID: Intellectual Disability. ^: patient carrying 11GT-5T/10TG-7T polymorphism.
