# Supplementary material for: Severe COVID-19 in Hospitalized Carriers of Single CFTR Pathogenic Variants
Source: MDPI journal article supplement (doi:10.3390/jpm11060558), 2021-06-15
Supplement: s1 [file s1]

**Table S3.** Carriers of *CFTR* pathogenic variants by COVID-19 outcome scale and sex

| Carriers of 1 CF-causing variant           |                       |                     |
|--------------------------------------------|-----------------------|---------------------|
|                                            | Female<br>(n=14, 35%) | Male<br>(n=26, 65%) |
| <b>COVID Outcome Scale, No. (%)</b>        |                       |                     |
| Cat. 1 (Death)                             | 2 (50%)               | 2 (50%)             |
| Cat. 2 (Invasive mechanical ventilation)   | 1 (16.67%)            | 5 (83.33%)*         |
| Cat. 3 (CPAP/BiPAP)                        | 4 (50%)               | 4 (50%)             |
| Cat. 4 (Hospitalized with low flow oxygen) | 2 (28.57%)            | 5 (71.43%)*         |
| Cat. 5 (Hospitalized without oxygen)       | 2 (40%)               | 3 (60%)*            |
| Cat. 6 (Not hospitalized)                  | 3 (30%)               | 7 (70%)*            |
| Carrier of 2 CF-causing variants           |                       |                     |
|                                            | Female (n=0)          | Male (n=1, 100%)    |
| Cat. 4 (Hospitalized with low flow oxygen) | 0                     | 1 (100%)            |

\*p<0.05 by Fisher exact test

CPAP: Continuous Positive Airway Pressure; BiPAP: Bilevel Positive Airway Pressure. Percentage in column 2 and 3 refers to the prevalence of males and females in the corresponding COVID-19 category.
