# Supplementary material for: Severe COVID-19 in Hospitalized Carriers of Single CFTR Pathogenic Variants
Source: MDPI journal article supplement (doi:10.3390/jpm11060558), 2021-06-15
Supplement: s1 [file s1]

**Table S4.** Presence of comorbidities by carrier status

|                                    | Not Carriers (n=833) | Carriers (n=40) |
|------------------------------------|----------------------|-----------------|
| <b>Chronic Conditions, No. (%)</b> |                      |                 |
| Hypertension                       | 239 (28.69) *        | 4 (10)          |
| Diabetes                           | 103 (12.36)          | 2 (5)           |
| Asthma and COPD                    | 69 (8.28)            | 3 (7.5)         |
| CHF and CAD                        | 61 (7.32)            | 6 (15)          |
| Malignancy                         | 63 (7.56)            | 2 (5)           |
| Hypothyroidism                     | 41 (4.92)            | 1 (2.5)         |
| Obesity                            | 28 (3.36)            | 1 (2.5)         |

\*p<0.05 vs carriers by Fisher exact test. CHF: Congestive Heart Failure; CAD: Coronary Artery Disease; COPD: Chronic Obstructive Pulmonary Disease.
