# Supplementary material for: Severe COVID-19 in Hospitalized Carriers of Single CFTR Pathogenic Variants
Source: J Pers Med. 2021 Jun 15;11(6):558. doi: 10.3390/jpm11060558 (PMC8232773; doi:10.3390/jpm11060558)
Supplement: Supplementary file 1 [file jpm-11-00558-s001.zip]

Archive with 5 entries (5 files):
- Supp Table 1_ok.pdf
- Supp Table 2_ok.pdf
- Supp Table 3_ok.pdf
- Supp Table 4_ok.pdf
- Supp Table 5_ok.pdf
